# Supplementary material for: Functional brain connectome-transcriptional landscape linking to transdiagnostic factors of psychopathological symptoms
Source: Research Square preprint supplement (doi:10.21203/rs.3.rs-3890054/v1), 2024-02-13
Supplement: Supplementary file 1 [file 750215e31943e27d221066b3.xlsx]

## Sheet: positive
VN_left	SMN_LEFT	DAN_LEFT	VAN_LEFT	LIMBIC_LEFT	FPN_LEFT	DMN_LEFT	VN_RIGHT	SMN_RIGHT	DAN_RIGHT	VAN_RIGHT	LIMBIC_RIGHT	FPN_RIGHT	DMN_RIGHT
0.0115583	0.0237729	0.0171246	0.0177177	0.012306	0.0147368	0.0219608	0.0149067	0.024389	0.0246231	0.037339	0.0304724	0.0168261	0.0173359
0.0312014	0.0232235	0.0126544	0.0202673	0.0283731	0.0409744	0.0148958	0.0187346	0.0404277	0.0117189	0.0231774	0.0390656	0.0188343	0.0370517
0.0275146	0.0384489	0.0267103	0.0367312	0.013173	0.0292274	0.0186778	0.0306404	0.0475813	0.0141261	0.0289265	0.0307872	0.0240167	0.0470017
0.0197064	0.0128652	0.0173331	0.0236652	0.0201066	0.0152286	0.0134691	0.0250095	0.034312	0.0145985	0.0293601	0.0279325	0.0235405	0.0309264
0.0366927	0.0147155	0.0291978	0.0164113	0.014062	0.017289	0.0378983	0.0374442	0.0192715	0.0229445	0.0217658	0.0308203	0.0184445	0.033308
0.0407376	0.0281413	0.0425049	0.0213265	0.0177602	0.0128294	0.0169548	0.0449339	0.051117	0.0200504	0.0257856	0.0313556	0.0194821	0.0123418
0.0414411	0.034462	0.0226993	0.0192359	0.0134099	0.0210191	0.0224153	0.0125409	0.0231503	0.0314323	0.0428017	0.0481996	0.0212747	0.0359993
0.0163252	0.0131802	0.0212763	0.0201304	0.032987	0.0200962	0.0170845	0.0151885	0.0287774	0.0222456	0.0162553	0.0497016	0.0189993	0.0157404
0.0166196	0.0189428	0.0174377	0.0228606	0.0191651	0.0118558	0.0197927	0.0117854	0.0308852	0.0231925	0.0303467	0.0173845	0.0243217	0.0351938
0.0216246	0.0173371	0.0231534	0.0197861	0.023426	0.0241476	0.0269886	0.0197686	0.0186135	0.0159311	0.0184978	0.0245231	0.0369692	0.016812
0.0279088	0.0126168	0.0179052	0.0168615	0.0315829	0.0281014	0.0162922	0.05015	0.0198515	0.0278057	0.0164662	0.0465373	0.0340406	0.0279258
0.0219212	0.0251469	0.0215819	0.0306432	0.0278742	0.0290032	0.0138094	0.0185938	0.0366084	0.0359776	0.0139138	0.0267393	0.0154724	0.0412797
0.0367311	0.0232653	0.0491351	0.0175873	0.0250514	0.0171179	0.0145694	0.0154026	0.0333192	0.0190988	0.0156454	0.039287	0.0133988	0.0231058
0.0413572	0.0221614	0.0463689	0.0302798	0.0154625	0.0176805	0.0136916	0.0162695	0.0151977	0.0340459	0.0326094	0.0226047	0.032724	0.0153159
0.0162389	0.0132219	0.0437596	0.0201726	0.037898	0.0300073	0.0244788	0.0480898	0.0137611	0.0214378	0.0243499	0.0197705	0.036683	0.0133785
0.0143503	0.0127265	0.0246791	0.0238967	0.0281922	0.0288318	0.0180256	0.0401392	0.0128634	0.0293158	0.0358234	0.0370257	0.0206599	0.0258052
0.0157699	0.0230672	0.0309519	0.0315119	0.0348419	0.0157741	0.0256433	0.0128339	0.0164515	0.0280099	0.0206705	0.0630242	0.0178367	0.0333215
0.0145168	0.0342946	0.0235886	0.0146987	0.018041	0.0133669	0.0204152	0.0130554	0.0185122	0.0408577	0.0254863	0.0584674	0.0186111	0.0183125
0.0165141	0.0126955	0.0245946	0.0261418	0.0125532	0.0388053	0.0229909	0.0142834	0.0223919	0.0174649	0.0182849	0.0468921	0.0149296	0.0232919
0.0195364	0.0214895	0.0493521	0.0201161	0.0232528	0.0166779	0.0210656	0.0165326	0.0407839	0.0183315	0.0117264	0.0492216	0.0144727	0.0194611
0.0214671	0.0419432	0.0188193	0.0264186	0.0265968	0.0118285	0.0146115	0.0133723	0.0151119	0.0365253	0.0182105	0.0440988	0.0313247	0.0134918
0.016259	0.0285583	0.0182947	0.0162651	0.0197533	0.0173228	0.0198972	0.0352573	0.0267586	0.0268917	0.0139633	0.0497257	0.0141679	0.0121807
0.0258111	0.0187141	0.036505	0.0191102	0.026222	0.0125948	0.0223805	0.0305822	0.0368232	0.0164064	0.0416533	0.0507427	0.0231355	0.0188807
0.0128529	0.0130037	0.0384009	0.0118882	0.0171839	0.0240442	0.014077	0.0229306	0.017948	0.0372959	0.0257877	0.0213412	0.0118293	0.0214252
0.026196	0.0239303	0.0265451	0.0409955		0.0214217	0.0282922	0.0374521	0.028587	0.0235312	0.0193841	0.0217202	0.0185194	0.0272794
0.0266808	0.0159297	0.0312261	0.0199916		0.0184302	0.023941	0.0271355	0.0416489	0.0141113	0.0350824	0.0294344	0.0231494	0.015557
0.0202362	0.011877	0.0231566	0.0300122		0.0473974	0.0230696	0.0186775	0.0449889	0.0175064	0.0149596	0.0117526	0.0244815	0.0137656
0.0168788	0.0135106	0.0203843	0.020369		0.0226648	0.0176687	0.0313186	0.0193314	0.0165184	0.0182081	0.0209649	0.0291758	0.0310736
0.0119272	0.0368869	0.040367	0.0155819		0.0299949	0.0311306	0.0152216	0.0139163	0.0254542	0.0327249	0.0419533	0.0385802	0.0127109
0.0316001	0.0170345	0.0492203	0.0283709		0.0187063	0.0200879	0.0327659	0.0145774	0.0143864	0.0139914	0.0225971	0.0197431	0.0150748
0.0213839	0.0294374	0.0413418	0.0281701		0.0246796	0.0147239	0.0125696	0.0276343	0.0234476	0.0352432	0.0531678	0.0168624	0.0159255
0.0279436	0.0303796	0.03596	0.0219066		0.0126381	0.0153688	0.0137378	0.0167353	0.0455111	0.0177725	0.043725	0.0300142	0.0142241
0.0179332	0.030121	0.0341449	0.014379		0.0178845	0.0117029	0.0234245	0.040434	0.0263268	0.0463539	0.0233721		0.0140305
0.0250234	0.0593341	0.0359535	0.028518		0.0143462	0.0183715	0.0283647	0.0156231	0.0221266	0.0285688	0.0291591		0.0269471
0.0469123	0.0230754	0.0257206	0.0276957			0.0363645	0.022524	0.0393785	0.0241159	0.0307433	0.0385743		0.0167292
0.0516404	0.0237453	0.0143923	0.01222			0.0162733	0.0153127	0.0202613	0.0198423	0.0327715	0.0321193		0.0337075
0.0185364	0.0364708	0.0204286	0.0156839			0.0370915	0.0209599	0.0294757	0.0335571	0.0341585	0.0201102		0.0150454
0.0225985	0.0215931	0.0170778	0.0132973			0.023685	0.0196318	0.0312466	0.0127796	0.0472169	0.0274931		0.017464
0.0164659	0.0241027	0.020842	0.0167774			0.02405	0.0184841	0.0373367	0.0217164	0.0327755	0.0347549		0.0312558
0.0258545	0.0147568	0.0162014	0.0182793			0.0238677	0.0388562	0.0246226	0.0341144	0.019415	0.0141393		0.0158234
0.0158459	0.0142853	0.032991	0.0170569			0.0162913	0.033724	0.0175807	0.0223771	0.020108	0.0210589		0.0217326
0.029393	0.0328456	0.0287221	0.0199784			0.0171063	0.0136564	0.0119885	0.0122114	0.0218325	0.0134782		0.0278345
0.0328346	0.023717	0.027144	0.0192843			0.0292754	0.0123403	0.0339504	0.0319547	0.0166035	0.0425172		0.0134908
0.0188734	0.0164117	0.0235741	0.031187			0.0203141	0.0194216	0.0314851	0.0333128	0.0184226	0.029511		0.015776
0.0159462	0.0152012	0.0589458	0.0226626			0.013729	0.0154701	0.0293841	0.0164788	0.0275071	0.0263898		0.0179839
0.0215905	0.0238633	0.0192688	0.0153178			0.0148214	0.0238306	0.0162193	0.0133549	0.013395	0.0259386		0.028956
0.0117369	0.012516	0.0262812	0.0174648			0.0417584	0.0228853	0.0493975	0.0167896	0.0202831	0.0233301		0.0123469
0.0275151	0.01254	0.0386297	0.0457431			0.0115665	0.0303778	0.0226173	0.0451257	0.0180316	0.0412327		0.0256385
0.041264	0.0167371	0.0236398	0.0143306			0.0130297	0.0216367	0.027256	0.0277371	0.0218076	0.0203287		0.0143519
0.0149631	0.034519	0.0168586	0.0395172			0.0133005	0.0229585	0.0214886	0.0211457	0.0254111	0.0159418		0.0191989
0.0243398	0.0225321	0.0280145	0.0122743			0.0181735	0.0530548	0.0227769	0.0176834	0.0376222	0.0301563		0.0116745
0.030911	0.0457069	0.0209082	0.0160562			0.014372	0.0265351	0.0201321	0.0202073	0.0131826	0.0376892		0.0163073
0.0302215	0.022414	0.0231672	0.0410743			0.0163978	0.0129674	0.0299087	0.0201638	0.0274627	0.0239997		0.0224388
0.0168267	0.0254929	0.0659748	0.017107			0.0144335	0.01583	0.0184118	0.0126928	0.0481718	0.0363756		0.0169994
0.011693	0.0247016	0.0127055	0.0203142			0.0217674	0.0476337	0.0129294	0.0133219	0.0286218	0.0316228		0.0146745
0.0182085	0.033819	0.0481524	0.0270498			0.0163303	0.0429649	0.0158737	0.0234902	0.0145251	0.0188541		0.0168436
0.0168526	0.0186029	0.0227605	0.0298797			0.0298503	0.0163625	0.0237977	0.0201202	0.024524	0.0204959		0.022504
0.0177622	0.0382477	0.028999	0.0285284			0.0354003	0.0385137	0.0153644	0.0267474	0.0122349	0.0195261		0.0212072
0.0162917	0.0225233	0.0316352	0.0226233			0.0181972	0.0433112	0.0155925	0.0146835	0.0172156	0.0395041		0.0239328
0.0157449	0.0187285	0.0419069	0.0179053			0.0276007	0.0469527	0.0130951	0.0254427	0.024855	0.0281749		0.0208594
0.0297047	0.0232804	0.0272437	0.0228983			0.0163451	0.0195657	0.0433	0.0343705	0.0324263	0.0231967		0.0117735
0.0154372	0.0246944	0.0268006	0.0154406			0.0223774	0.036865	0.0189002	0.0189223	0.0685419	0.0432952		0.0186171
0.0306359	0.0117428	0.0195432	0.0193024			0.0207427	0.0435089	0.0181646	0.0133156	0.0611749	0.0406686		0.0200642
0.0186006	0.0154545	0.0272551	0.0345739			0.0197976	0.0369797	0.0179162	0.0303808	0.0133598	0.0237213		0.018636
0.0120689	0.0227898	0.0432883	0.0285985			0.0273434	0.0167932	0.0278593	0.0327813	0.0298471	0.0169533		0.0152952
0.0221996	0.0171593	0.0280451	0.037301			0.0272532	0.02498	0.0421922	0.0171564	0.0286586	0.0242047		0.0380904
0.0182508	0.012465	0.0159346	0.0304073			0.0187848	0.0329491	0.0331305	0.0232547	0.0254224	0.0175675		0.0135938
0.024358	0.0158022	0.0296328	0.0126765			0.0151511	0.0167091	0.026176	0.0187148	0.0591011	0.0128177		0.0231581
0.0328333	0.0131437	0.0225276	0.0191023			0.0419734	0.0164052	0.0230195	0.0172069	0.0427085	0.046646		0.0148531
0.0547005	0.0131273	0.0308311	0.0392143			0.0279098	0.0175937	0.0297365	0.014736	0.0314169	0.0372199		0.0120582
0.0508117	0.0152989	0.0191849	0.0393879			0.0308705	0.0195894	0.0411725	0.0145451	0.0154476	0.0364075		0.0297077
0.0187266	0.0469651	0.0116124	0.0428707			0.0229507	0.0542298	0.0217508	0.0154747	0.0369228	0.0236878		0.0341977
0.0284898	0.0214202	0.0285105	0.0282303			0.0309497	0.0217374	0.0213269	0.0184606	0.0544095	0.0284116		0.0129707
0.0174746	0.020564	0.0393294	0.0127385			0.0328925	0.0148253	0.0334528	0.0172054	0.0566091	0.0307685		0.0243481
0.0273436	0.0532355	0.0136622	0.0195746			0.0289756	0.0303042	0.0139927	0.0159859	0.0590739	0.0379422		0.0241896
0.024008	0.0201272	0.0325086	0.0409245			0.0166965	0.0166356	0.029896	0.0150746	0.019091	0.0231852		0.0149617
0.0250366	0.0123046	0.0414722	0.0221946			0.0297021	0.0122446	0.0173949	0.0154442	0.0145719	0.0150689		0.0377981
0.0337591	0.0159092	0.0167355	0.0392221			0.0266951	0.012055	0.0353568	0.0140564	0.0402391	0.0258536		0.0281078
0.0313568	0.0136639	0.0302247	0.017101			0.0139865	0.0332316	0.0205588	0.0129262	0.0438313	0.014805		0.0328932
0.0155755	0.0153324	0.0290686	0.0159726			0.0231798	0.0221192	0.0294912	0.0188802	0.0441018	0.0164011		0.0154427
0.0204028	0.0120111	0.0482294	0.0353112			0.0213168	0.0183875	0.029746	0.0121233	0.0659774	0.0261668		0.0165956
0.0117446	0.0272352	0.0121839	0.0550359			0.022111	0.0139272	0.0302418	0.0122609	0.0385255	0.0125124		0.0283896
0.0400922	0.016317	0.0182698	0.026601			0.0160949	0.0625936	0.0158811	0.0156615	0.0446645	0.0344432		0.022368
0.0374173		0.0276458	0.0249531			0.0250985	0.0372858	0.0283531	0.0133612	0.0173631			0.0282739
0.0185922						0.0282013	0.0231972	0.0237513	0.0146377	0.0396698			0.026246
0.0117969						0.0119682	0.0209382	0.0164135	0.0132894	0.0262862			0.0306061
0.0191527						0.026332	0.0427498	0.0193926	0.0177555	0.0420482			0.0196502
0.0181977						0.0143168	0.0150017	0.0220912	0.0191667	0.0156187			0.0250575
0.0566683						0.0269616	0.0316901	0.0196399	0.0185947	0.0350062			0.0260589
0.0238293						0.0316617	0.039477	0.0123234	0.0203733	0.0369317			0.0206194
0.0225673						0.0132506	0.0568781	0.0281364	0.032378	0.0142275			0.0206772
0.0130953						0.0309543	0.02002	0.0278752	0.0316123	0.0162446			0.0343868
0.0232065						0.020189	0.0389677	0.0220346	0.0184389	0.0186759			0.0176214
0.0206224						0.0485743	0.0166816	0.0188224	0.0332636				0.0393681
0.0190798						0.0252589	0.0331306	0.0154691	0.0268113				0.0177751
0.0116099						0.018908	0.0316	0.0345926	0.0125081				0.0156148
0.0122623						0.0238391	0.0357118	0.0300158	0.0335442				0.024391
0.0201211						0.0331968	0.0381844	0.0177308	0.0329924				0.0335598
0.0435953						0.0200676	0.0257487	0.0259189	0.0120566				0.0158558
0.0381304						0.034119	0.0475211	0.0190048	0.0128206				0.0281863
0.013776						0.012623	0.0218187	0.0204283	0.0226727				0.0297052
0.0214698						0.0135016	0.0153987	0.0289703	0.0168806				0.0191424
0.0191128						0.0175165	0.0186483	0.0143439	0.0123578				0.0128077
0.0119113						0.0350886	0.0169293		0.0144876				0.0138688
0.0123064						0.0126713	0.0331023						0.0223942
0.0266593						0.0275459	0.0357927						0.0254053
0.0235848						0.0384718	0.0250734						0.0413306
0.0139089						0.0211363	0.0148336						0.0124146
0.022581						0.0186107	0.0251507						0.0335883
0.0121533						0.0235886	0.0264323						0.0167289
0.0177484						0.0338421	0.0228903						0.0228329
0.0128226						0.0128065	0.013967						0.0208073
0.0129526						0.0172437	0.0261169						0.0154302
0.0254257						0.0229134	0.0253474						0.0276434
0.0166646						0.0195462	0.0125735						0.0237987
0.0197637						0.0166964	0.0225442						0.0331419
0.0145546						0.0204631	0.0163661						0.0357465
0.0189447						0.028408	0.0126774						0.0212529
0.0343437						0.0145054	0.0334577						0.0160288
0.0160905						0.0136035	0.0244482						0.0199429
0.0434362						0.0349008	0.0235832						0.0145079
0.0246944						0.0232146	0.0381254						0.0129331
0.015142						0.0201659	0.0197793						0.0553096
0.0246266						0.0283671	0.0328585						0.0199456
0.0154388						0.0292221	0.0256145						0.0387599
0.0300204						0.0294214	0.0234051						0.0235504
0.0463787						0.0559997	0.0128972						0.021511
0.0325142						0.0188858	0.0193475						0.0416111
0.0149102						0.0301729	0.0229578						0.0296248
0.0249835						0.0396129	0.0313174						0.0199655
0.0270688						0.0268571	0.0255996						0.0240657
0.0136807						0.0379273	0.030822						0.0138658
0.0169996						0.0244298	0.0150641						0.0308565
0.0270038						0.0249624	0.0148645						0.0266795
0.0164683						0.0284434	0.0321491						0.0132076
0.0279162						0.0144789	0.018402						0.0204921
0.0157328						0.0140694	0.0191153						0.0186262
0.0481915						0.0202645	0.0133234						0.0197121
0.015823						0.0230629	0.0183811						0.0386636
0.0231076						0.0218101	0.0496159						0.0206706
0.0191697						0.0289887	0.0444889						0.0204569
0.026775						0.0144149	0.0333066						0.0218575
0.0164752						0.0152154	0.011791						0.0157287
0.0125722						0.0158088	0.0270132						0.0152779
0.0148909						0.0241248	0.0265404						0.0185702
0.0120009						0.0120369	0.0492318						0.018676
0.0279843						0.0269719	0.046167						0.013187
0.0187746						0.0212494	0.0140286						0.0208762
						0.0138663	0.019152						0.0119902
						0.0317353	0.0352813						0.0128998
						0.0352574	0.0366654						0.0165129
						0.0197108	0.0439163						0.0120508
						0.0229913	0.0263909						0.0144943
						0.0197624	0.0233448						0.0295271
						0.0205251	0.0375803						0.0221433
						0.0336458	0.043968						0.0161276
						0.0131154	0.0186391						0.0121944
						0.0322662	0.0195634						0.0271217
						0.0244945	0.0174679						0.0302028
						0.0176702	0.0183447						0.0233652
						0.025701	0.0160574						0.0320841
						0.0123129	0.0279003						0.0277332
						0.0279038	0.0278636						0.0330178
						0.0310356	0.0292159						0.0153592
						0.0232842	0.0236721						0.0186194
						0.038759							0.0137885
						0.0374116							0.0202182
						0.0163576							0.0386462
						0.0392798							0.0264396
						0.0393217							0.0246564
						0.0125368							0.0226032
						0.0183165							0.0230499
						0.0604498							0.0296965
						0.0548056							0.0161751
						0.0496145							0.0150099
						0.0324511							0.0201323
						0.0488744							0.0150734
						0.0425443							0.0335882
						0.0707245							0.0183705
						0.0295253							0.0330355
						0.0201367							0.0381886
						0.0300503							0.0259566
						0.0276636							0.0241717
						0.0148593							0.022046
													0.0294604
													0.0192324
													0.0297345
													0.04784
													0.0224836
													0.0204617

## Sheet: negative
VN_left	SMN_LEFT	DAN_LEFT	VAN_LEFT	LIMBIC_LEFT	FPN_LEFT	DMN_LEFT	VN_RIGHT	SMN_RIGHT	DAN_RIGHT	VAN_RIGHT	LIMBIC_RIGHT	FPN_RIGHT	DMN_RIGHT
-0.0151034	-0.0123298	-0.0131538	-0.0212285	-0.0259106	-0.0172035	-0.019442	-0.0152304	-0.0309814	-0.0288145	-0.0172506	-0.0135363	-0.0117619	-0.011548
-0.0116572	-0.0198689	-0.0168553	-0.0190307	-0.0620985	-0.02294	-0.0218796	-0.0151292	-0.024933	-0.0419137	-0.0185752	-0.0218287	-0.0116871	-0.0133365
-0.0317161	-0.0197995	-0.0266451	-0.0214968	-0.0471733	-0.0190891	-0.0264518	-0.0207723	-0.0150492	-0.0127508	-0.0121518	-0.0231884	-0.0296092	-0.0290394
-0.0154228	-0.0179939	-0.0143031	-0.0281124	-0.0263553	-0.0247194	-0.0165668	-0.0330163	-0.0304131	-0.0251806	-0.0189803	-0.0256661	-0.0212444	-0.0128702
-0.0368136	-0.0288	-0.0130402	-0.0199804	-0.0559589	-0.0155672	-0.0239793	-0.015902	-0.02662	-0.0224895	-0.0212626	-0.0157459	-0.0139716	-0.0169259
-0.0171916	-0.0243429	-0.0203311	-0.0249299	-0.0265972	-0.0123974	-0.0190793	-0.0323698	-0.0206801	-0.024533	-0.0143389	-0.0167303	-0.0221994	-0.0173691
-0.0432147	-0.0287561	-0.0202759	-0.0223393	-0.0462387	-0.0118282	-0.0134373	-0.0267484	-0.0231906	-0.0200385	-0.0325803	-0.0157585	-0.0118723	-0.0215879
-0.0237754	-0.026762	-0.0128191	-0.0277838	-0.0124144	-0.0346506	-0.0144486	-0.0231964	-0.0197383	-0.025527	-0.0386109	-0.016319	-0.0148851	-0.0390478
-0.011921	-0.0263181	-0.0131177	-0.0147124	-0.0388113	-0.016213	-0.0179558	-0.0186629	-0.0116788	-0.0185171	-0.0211911	-0.025807	-0.0331369	-0.0142272
-0.0473415	-0.0120504	-0.0199425	-0.0173261	-0.0257022	-0.0372121	-0.0378964	-0.0133873	-0.0126611	-0.0169886	-0.0270166	-0.0194433	-0.0121849	-0.015089
-0.0133476	-0.0149884	-0.0244853	-0.0150897	-0.0186397	-0.0276987	-0.0129143	-0.0224096	-0.025204	-0.0165304	-0.0129799	-0.0206061	-0.0167099	-0.0218708
-0.0230822	-0.0198873	-0.02592	-0.0199488	-0.0179444	-0.0199186	-0.0281974	-0.0203851	-0.0125806	-0.0119608	-0.015344	-0.0209071	-0.0173738	-0.0232898
-0.0487542	-0.0139567	-0.0118818	-0.018225	-0.0159495	-0.0164869	-0.021368	-0.0253432	-0.0158141	-0.0116402	-0.0116679	-0.0140536	-0.0134741	-0.0132149
-0.0279697	-0.0270772	-0.0190718	-0.0226128	-0.0508501	-0.0164176	-0.026349	-0.0313214	-0.0280938	-0.0124175	-0.0187973	-0.0170168	-0.0168803	-0.0151179
-0.0364038	-0.0216915	-0.0171549	-0.0310953	-0.0194159	-0.0276413	-0.0179612	-0.0282581	-0.0236411	-0.0276658	-0.0263717	-0.0143632	-0.017837	-0.0199775
-0.0367173	-0.0196608	-0.0141891	-0.0163726	-0.0307658	-0.0214575	-0.0264916	-0.0273906	-0.0406295	-0.0199812	-0.0235425	-0.024622	-0.013413	-0.0196371
-0.0125072	-0.019781	-0.0155542	-0.0225673	-0.0278266	-0.0185989	-0.0492346	-0.0173527	-0.0241048	-0.0151635	-0.0285754		-0.0119622	-0.0248472
-0.0458531	-0.0221481	-0.0205071	-0.0370353	-0.0365992	-0.0196769	-0.0401713	-0.0142569	-0.0320525	-0.0117696	-0.0310978		-0.0235287	-0.0155624
-0.0272579	-0.0399197	-0.0220178	-0.0158115	-0.0116168	-0.0190271	-0.0215503	-0.0164106	-0.0153522	-0.0158446	-0.0189587		-0.0136656	-0.0296735
-0.0147022	-0.0192882	-0.0288691	-0.0216666	-0.023546	-0.0188132	-0.0435201	-0.0173946	-0.0226412	-0.0364117	-0.0224014		-0.0245002	-0.0122374
-0.0395404	-0.0332395	-0.0288184	-0.0136252	-0.0203641	-0.0315664	-0.0307027	-0.0304208	-0.0143673	-0.0329745	-0.0139094		-0.0127987	-0.0389626
-0.0214469	-0.0311012	-0.0308897	-0.0220128	-0.0137962	-0.0122009	-0.0376736	-0.0319622	-0.0163562	-0.0174731	-0.0140504		-0.0194576	-0.0164144
-0.0163809	-0.0424899	-0.0138118	-0.0263649	-0.0184867	-0.0258251	-0.0157545	-0.0194096	-0.0247383	-0.0170491	-0.0220831		-0.0217325	-0.0214123
-0.0155469	-0.0318168	-0.029409	-0.0151857	-0.0162793	-0.0115496	-0.0139619	-0.0258806	-0.0128201	-0.0331846	-0.0115875		-0.0153857	-0.0282139
-0.0159345	-0.0483073	-0.0238203	-0.0175383	-0.0269022	-0.0483791	-0.0128256	-0.0127891	-0.0142811	-0.0357495	-0.0143044		-0.0147477	-0.0320778
-0.0217594	-0.0194652	-0.0199455	-0.02126	-0.0166119	-0.0318929	-0.0162949	-0.0175612	-0.0140893	-0.0210041	-0.0128159		-0.0125682	-0.0361176
-0.0226125	-0.0311093	-0.0239413	-0.0212325	-0.0153839	-0.0158559	-0.013745	-0.0216029	-0.0167004	-0.0189162	-0.0117819		-0.0232331	-0.0229454
-0.0145795	-0.0337792	-0.0244045	-0.0140917	-0.0131082	-0.0385073	-0.0227218	-0.0272268	-0.0194017	-0.0236442	-0.030117		-0.0167891	-0.016545
-0.0158329	-0.013058	-0.0216892	-0.0236093	-0.0204495	-0.030307	-0.0203121	-0.0150729	-0.0118998	-0.0176301	-0.012451		-0.0120555	-0.0390503
-0.0455719	-0.0270057	-0.0221874	-0.0234056	-0.0168123	-0.0254218	-0.0470749	-0.0215437	-0.0233827	-0.0180263	-0.0216335		-0.0361699	-0.0145051
-0.0318919	-0.041082	-0.01358	-0.0192433	-0.0367998	-0.0123324	-0.0295267	-0.0446007	-0.0183183	-0.0254536	-0.0162817		-0.0134171	-0.0225456
-0.031404	-0.0178102	-0.0205171	-0.0164524	-0.0449738	-0.0323646	-0.02512	-0.0276908	-0.0116304	-0.0140497	-0.0320275		-0.0157864	-0.0358544
-0.0335055	-0.0137193	-0.0144025	-0.0160051	-0.0350338	-0.0116706	-0.0247338	-0.0258982	-0.0241023	-0.014905	-0.0260084		-0.0258182	-0.0115334
-0.0489127	-0.0276752	-0.0216952	-0.0173578	-0.0133105	-0.0181732	-0.0320108	-0.0223831	-0.0287987	-0.0150483	-0.0137241		-0.0210438	-0.0233991
-0.0223532	-0.0356623	-0.015475	-0.0210108	-0.0153847	-0.0130154	-0.014815	-0.0115584	-0.0280815	-0.0139312	-0.0246261			-0.0143766
-0.0117529	-0.0275003	-0.0141771	-0.0121411	-0.0129444	-0.0205954	-0.0356312	-0.0268315	-0.0235442	-0.0215043	-0.0152051			-0.0167107
-0.0161649	-0.0354988	-0.012337	-0.0231304	-0.0184347	-0.0241038	-0.0175015	-0.0310415	-0.0162558	-0.021863	-0.0279762			-0.0319923
-0.0126152	-0.0171882	-0.0191047	-0.012294	-0.0207022	-0.0189364	-0.0158878	-0.0166834	-0.0169664	-0.026257	-0.0120459			-0.0127733
-0.0168433	-0.028418	-0.014573	-0.0210851	-0.028843	-0.0270792	-0.0348937	-0.0225981	-0.045398	-0.0289467	-0.0220904			-0.0281381
-0.0181062	-0.0164856	-0.0173331	-0.022549	-0.0397538	-0.0132694	-0.0154887	-0.0204835	-0.0351487	-0.0290943	-0.0182194			-0.0197967
-0.0411704	-0.0338762	-0.0183034	-0.0188477	-0.0284193	-0.016658	-0.0234052	-0.0115556	-0.0121753	-0.0225499	-0.028968			-0.0122992
-0.0119396	-0.032352	-0.0127276	-0.0348904	-0.0184224	-0.016274	-0.0267604	-0.0132201	-0.0134347	-0.0247312	-0.0270605			-0.0641177
-0.0346153	-0.0122622	-0.0143848	-0.0139218	-0.0359775	-0.0181374	-0.0556141	-0.0151949	-0.0143149	-0.0322328	-0.0211348			-0.0236997
-0.0201766	-0.0283984	-0.0191019	-0.0141683	-0.016418	-0.0342401	-0.046268	-0.0256923	-0.0428778	-0.0368791	-0.0178486			-0.0346668
-0.0265575	-0.0277817	-0.0167618	-0.0145646	-0.0234998	-0.0139145	-0.0391736	-0.0196547	-0.0240396	-0.0167231	-0.0218366			-0.0182272
-0.0116741	-0.0343266	-0.0149913	-0.0328342	-0.0378359	-0.0263047	-0.0117794	-0.0150628	-0.029423	-0.0208655	-0.0189358			-0.0274344
-0.0124443	-0.0140023	-0.0146063	-0.0204026	-0.0190185	-0.0139926	-0.0156164	-0.0207853	-0.0170844	-0.021032	-0.033127			-0.0274569
-0.0341918	-0.0402223	-0.0146286	-0.0265912	-0.0126344	-0.0135151	-0.0265501	-0.0275785	-0.0133951	-0.0128855	-0.0178405			-0.0246751
-0.0451351	-0.0318009	-0.0173916	-0.0230076	-0.0357404	-0.0200234	-0.0240994	-0.0122159	-0.0200949	-0.0320826	-0.0400608			-0.0370483
-0.0289882	-0.0116369		-0.0120576	-0.0307182	-0.0356824	-0.0130665	-0.0244589	-0.0166702	-0.0303024	-0.0379522			-0.0384109
-0.0145717	-0.0159233		-0.027307	-0.0299856	-0.0460338	-0.0243879	-0.0138252	-0.019364	-0.0148023	-0.0221536			-0.0342682
-0.0376958	-0.014458		-0.0403707	-0.0218889	-0.0214924	-0.0422424	-0.0329786	-0.0238817	-0.0141022	-0.0351591			-0.0211068
-0.024308	-0.018733		-0.0230215	-0.0158139	-0.0319857	-0.0169004	-0.0158283	-0.0280377	-0.021124	-0.0183699			-0.0174049
-0.0183825	-0.0320881		-0.0121972		-0.0288787	-0.0146003	-0.0179934	-0.0238062	-0.0120347	-0.0122222			-0.0307962
-0.0223399	-0.0220807		-0.0129214		-0.014563	-0.02394	-0.0124081	-0.0437176	-0.0127764	-0.0162403			-0.0248499
-0.0164092	-0.0170256		-0.0119655		-0.0395931	-0.0135671	-0.0170294	-0.0276915	-0.0141584	-0.0337642			-0.0118752
-0.0182985	-0.037107		-0.0119218		-0.0171171	-0.0136013	-0.0303951	-0.0207501	-0.0242315	-0.0208769			-0.0194097
-0.0159652	-0.0157258		-0.0134799		-0.0200589	-0.0115926	-0.0125752	-0.0278305	-0.0309606	-0.0115257			-0.0140959
-0.0260647	-0.017175		-0.025935		-0.0147657	-0.0379726	-0.0330927	-0.0245369	-0.0288434	-0.0166316			-0.0240884
-0.032721	-0.0260617		-0.0120066		-0.0370086	-0.0253663	-0.0248019	-0.0382348	-0.0251552	-0.0264655			-0.0138271
-0.0246039	-0.0116353		-0.0168277		-0.0132117	-0.0143877	-0.017953	-0.029695	-0.0192592	-0.0321166			-0.0253473
-0.041041	-0.027569		-0.0283804		-0.013363	-0.0186218	-0.0157614	-0.0217684	-0.0226868	-0.0310759			-0.0197325
-0.0262923	-0.0236086		-0.0218459		-0.0178855	-0.0149267	-0.0133255	-0.021703	-0.0168351	-0.0149675			-0.0178432
-0.0233868	-0.0220644		-0.0119582		-0.0119261	-0.0360469	-0.0146754	-0.0226054	-0.0212505	-0.0263317			-0.0235544
-0.0267267	-0.0338939		-0.0173241		-0.0117903	-0.0146373	-0.0126792	-0.0154737	-0.0231982	-0.0152037			-0.0266789
-0.0216134	-0.0177078		-0.0118388		-0.0380393	-0.0393097	-0.025342		-0.0192153	-0.0352164			-0.0150795
-0.0173875	-0.0290808		-0.0191788		-0.0144075	-0.0129909	-0.0272424		-0.0288862	-0.0254812			-0.0201494
-0.0162005	-0.0212977		-0.0506371		-0.0223654	-0.0123791	-0.0233164		-0.0263281	-0.0335826			-0.0120712
-0.0206956	-0.0165385		-0.0255955			-0.0336372	-0.0316352		-0.04619	-0.0315373			-0.0125276
-0.0293605	-0.0183943		-0.0313888			-0.0298842	-0.020195		-0.0123899	-0.0159951			-0.020481
-0.0233724	-0.0194754		-0.0412219			-0.0178257	-0.0184071		-0.0197524	-0.0271508			-0.0311712
-0.0143691	-0.01936		-0.0386638			-0.0370955			-0.0162109	-0.022343			-0.0392626
-0.0212556	-0.028397		-0.0270794			-0.0171562			-0.0136379	-0.0174689			-0.0315143
-0.0131582	-0.0190895		-0.0168711			-0.0247078			-0.029816	-0.0189315			-0.0161151
-0.0266173	-0.0173891		-0.0264347			-0.0234473			-0.0323331	-0.0377463			-0.0164505
-0.0165218	-0.0271799		-0.0468712			-0.0154515			-0.0157496	-0.0181142			-0.0263211
-0.0129985	-0.0179451		-0.0443373			-0.0301854			-0.0329154	-0.0436777			-0.0230614
-0.0166497	-0.0137802		-0.0129618			-0.0294246			-0.0117129	-0.0485026			-0.0209193
-0.0183604	-0.0478037		-0.0167485			-0.0227209			-0.0248432	-0.0438513			-0.0414614
-0.0158428	-0.0235273		-0.0305219			-0.0189769			-0.0195779	-0.0170155			-0.0184681
-0.0135471	-0.0240003		-0.0203242			-0.0119616			-0.0444657	-0.0302969			-0.0250204
-0.0173234	-0.0259255					-0.0129064			-0.029838	-0.0131111			-0.01469
-0.0162401	-0.0209696					-0.0119864			-0.0252249	-0.0302903			-0.0162098
-0.0186555						-0.0117904			-0.0181695	-0.0217563			-0.0137117
-0.0193281						-0.0150827			-0.0129982	-0.0503571			-0.0123331
-0.0125137						-0.0157905			-0.0241881	-0.0359017			-0.0200197
-0.0127556						-0.0315683				-0.0161542			-0.0238595
-0.0241765						-0.0178626				-0.0127939			-0.01312
-0.028021						-0.0177141				-0.0395207			-0.0229634
-0.024949						-0.0184832				-0.0193677			-0.0220028
-0.0137974						-0.0182985				-0.0181819			-0.0353363
-0.0125861						-0.0116334				-0.0253034			-0.013087
-0.0136292						-0.0166493				-0.0379603			-0.025245
-0.0443272						-0.0361285							-0.014727
-0.033818						-0.0254083							-0.0280482
-0.0358407						-0.0127945							-0.0340479
-0.0329822						-0.0148922							-0.0272781
-0.0292844						-0.0190511							-0.0136727
-0.0135014						-0.0205991							-0.0184612
-0.0295272						-0.0180524							-0.0328326
-0.0311339						-0.0167096							-0.0177969
-0.016975						-0.0462074							-0.0127967
-0.0128744						-0.0122013							-0.0175583
						-0.0280392							-0.0225988
						-0.0246066							-0.0331335
						-0.0159292							-0.0252801
						-0.0376559							-0.0146269
						-0.0279245							-0.0244845
						-0.0277569							-0.027988
						-0.0427307							-0.0161786
						-0.0301023							-0.0317532
						-0.0183723							-0.0372037
						-0.0429134							-0.0434334
						-0.0468507							-0.0217053
						-0.0229096							-0.0309856
						-0.0118334							-0.0205821
						-0.0273408							-0.0203461
						-0.0120134							-0.0168857
						-0.0323335							-0.0192893
						-0.0237493							-0.0189119
						-0.0265805							-0.0314424
						-0.0139581							-0.0281937
						-0.0486762							-0.0350922
						-0.0316735							-0.0334133
						-0.0232356							-0.0249173
						-0.030391							-0.0148535
						-0.0203128							-0.022993
						-0.0303165							-0.0230338
						-0.027421							-0.019549
						-0.0217311							-0.0277212
						-0.0203308							-0.0326951
						-0.0360288							-0.0135362
						-0.0325728							-0.0311573
						-0.0316832							-0.0119472
						-0.0315641							-0.0162799
						-0.0140293							-0.0359852
						-0.0282067							-0.0176573
						-0.0205147							-0.0173579
						-0.0118957							-0.0189741
						-0.01267							-0.0132676
						-0.0137152							-0.0218169
						-0.0177033							-0.0203953
						-0.0295575							-0.0292738
						-0.0262172							-0.025056
						-0.023057							-0.0186307
						-0.0235016							-0.0147491
						-0.0244521							-0.0245655
						-0.0196162							-0.0210392
						-0.0493156							-0.0292908
						-0.0121922							-0.0307874
						-0.0145614							-0.0147953
						-0.0145635							-0.0236151
						-0.0151134							-0.0357618
						-0.0181981							-0.0315916
						-0.0186763							-0.0194648
						-0.0253442							-0.017863
						-0.0300053							-0.0180124
						-0.0247018							-0.030193
						-0.0142128							-0.0117776
						-0.0143981							-0.0118072
						-0.0273535							-0.0192907
						-0.0206106							-0.0153097
						-0.0116303							-0.019226
						-0.0201142							-0.0221347
						-0.0204146							-0.0134008
						-0.0174303							-0.0185951
						-0.0206069							-0.0192979
													-0.0147578
													-0.0130518
													-0.0215097
													-0.0197088
